# Supplementary material for: Changes in intra- and extracranial carotid plaque calcification: a 2-year follow-up study
Source: PubMed Central journal article supplement (PMC10209086; doi:10.1038/s41598-023-34223-7), 2023-05-24
Supplement: 41598_2023_34223_MOESM1_ESM.pdf [file 41598_2023_34223_MOESM1_ESM.pdf]

## **Supplemental Results**

**Supplemental Table 1.** Differences between calcifications at baseline and two year follow-up (per artery)

|                                               | <b>ECAC</b><br><b>n=156</b> | <b>ICAC</b><br><b>n=140</b> |
|-----------------------------------------------|-----------------------------|-----------------------------|
| <b>Change in calcification volume (n (%))</b> |                             |                             |
| Increase                                      | 72 (46.2%)                  | 63 (45.0%)                  |
| Stable                                        | 31 (19.8%)                  | 42 (30.0%)                  |
| Decrease                                      | 53 (34.0%)                  | 35 (25.0%)                  |
| <b>Absolute differences (mm<sup>3</sup>)</b>  |                             |                             |
| All arteries                                  | 1.0 [-29.3;30.8]            | 0.7 [-2.3;12.9]             |
| Increase                                      | 23.0 [3.9;40.1]             | 12.9 [7.2;27.5]             |
| Decrease                                      | -36.4 [-78.4;-10.0]         | -32.8 [-88.7;-11.5]         |

Increase and decrease of calcification volumes are defined as an increase or decrease of  $\geq 10\%$  compared to the baseline calcification volume. Patients with stabilizing calcification volumes either had calcification volumes of 0 at baseline and follow-up, or had  $< 10\%$  increase or decrease of calcification volume compared to baseline.

**Supplemental Table 2.** Change in atherosclerotic plaque calcification for both carotid arteries per patient.

|          | <b>ECAC</b><br><b>n=78</b> | <b>ICAC</b><br><b>n=70</b> |
|----------|----------------------------|----------------------------|
| Increase | 34 (43.6%)                 | 31 (44.3%)                 |
| Stable   | 6 (7.7%)                   | 10 (14.3%)                 |
| Decrease | 15 (19.2%)                 | 12 (17.1%)                 |

Values represent n(%).
